# 1 ABPP-HT - high-throughput activity-based profiling of deubiquitylating 2 enzyme inhibitors in a cellular context

3  
4 **Hannah Jones<sup>1</sup>, Raphael Heilig<sup>1</sup>, Roman Fischer<sup>1</sup>, Benedikt M Kessler<sup>1</sup>, Adan Pinto-Fernandez<sup>1\*</sup>**

5 <sup>1</sup>Target Discovery Institute, Centre for Medicines Discovery, Nuffield Department of Medicine, University of  
6 Oxford, Oxford OX3 7FZ, United Kingdom

7 **\* Correspondence:**

8 Corresponding Author

9 [adan.pintofernandez@ndm.ox.ac.uk](mailto:adan.pintofernandez@ndm.ox.ac.uk)

10 **Keywords: activitomics, activity-based probes, deubiquitylating enzymes, ubiquitin, proteomics,**  
11 **drug discovery, pharmacology, chemical biology.**

12 **Abstract** (142 words)

13 The potency and selectivity of a small molecule inhibitor are key parameters to assess during the early stages  
14 of drug discovery. In particular, it is very informative for characterizing compounds in a relevant cellular context  
15 in order to reveal potential off-target effects and drug efficacy. Activity-based probes (ABPs) are valuable tools  
16 for that purpose, however, obtaining cellular target engagement data in a high-throughput format has been  
17 particularly challenging. Here, we describe a new methodology named ABPP-HT (high-throughput-compatible  
18 activity-based protein profiling), implementing a semi-automated proteomic sample preparation workflow  
19 that increases the throughput capabilities of the classical ABPP workflow approximately ten times while  
20 preserving its enzyme profiling characteristics. Using a panel of deubiquitylating enzyme (DUB) inhibitors, we  
21 demonstrate the feasibility of ABPP-HT to provide compound selectivity profiles of endogenous DUBs in a  
22 cellular context at a fraction of time as compared to previous methodologies.

## 23 **1 Introduction**

24 Activity-based probes (ABPs) can assess enzyme activity and inhibition within a cellular environment, thereby  
25 providing a considerable advantage over classical biochemical and enzyme assays. ABPs typically consist of a  
26 reactive group that binds to the active site of an enzyme, mostly in a covalent fashion, a specific binding  
27 group/linker to aid target binding/prevent steric hindrance, and a reporter tag for fluorescence or affinity  
28 (Chen et al., 2017; Chakrabarty et al., 2019; Deng et al., 2020). ABPs with an electrophilic reactive group can  
29 be applied to multiple enzymes including serine hydrolases, kinases, metalloproteases and cysteine proteases  
30 (Niphakis and Cravatt, 2014). Where a nucleophilic active site does not exist, photo-affinity probes can be  
31 applied instead (Niphakis and Cravatt, 2014; Mathur et al., 2020). A very informative application of these  
32 probes is the activity-based protein profiling (ABPP), combining labeling with ABPs, immunoaffinity  
33 purification, and mass spectrometry (IAP-MS) to analyze the probe interactome (Benns et al., 2021). ABPP has  
34 been used to study the potency and selectivity of small molecule inhibitors in an unbiased manner, in a cellular  
35 matrix (Nguyen et al., 2017; Wang et al., 2018).

36 Profiling the ubiquitin conjugating activity of E3 ubiquitin ligases and deubiquitylating enzymes (DUBs) is of  
37 significant interest due to post-translational protein ubiquitination regulating numerous cellular pathways.

38 These include protein degradation, localization or controlling function (Hershko and Ciechanover, 1992;  
39 Mukhopadhyay and Riezman, 2007). Dysregulation of ubiquitination has been linked to several pathologies  
40 including cancers and neurodegenerative diseases (Popovic et al., 2014). Consequently, various E3 ligases and  
41 DUBs are being evaluated as potential drug targets for either protein targeting chimeras (PROTACs) or  
42 inhibitors, respectively, due to their proven ability to specifically target cellular protein homeostasis (Huang  
43 and Dixit, 2016; Lai and Crews, 2017; Harrigan et al., 2018).

44 DUBs offer a mechanistic entry point for probe targeting as the majority are cysteine proteases, with a smaller  
45 subsection (< 15 %) functioning as metalloproteases (Komander et al., 2009; Clague et al., 2019). The activity  
46 of thiol protease DUBs can be ascertained via covalent attachment of an electrophile to their nucleophilic  
47 active site within the catalytic domain. This was first achieved by replacing the C-terminal glycine 76 of  
48 ubiquitin with glycylyl vinyl sulfone (Borodovsky et al., 2001), and further developed towards a panel of seven  
49 different Ub probes with different electrophilic warheads (Borodovsky et al., 2002). These studies have  
50 provided the framework for expanding the ubiquitin-based probe concept regarding synthesis (El Oualid et al.,  
51 2010) and chemical capture (Hewings et al., 2017), but also targeting metallo-DUBs (Hameed et al., 2019) and  
52 E3 ligases (Mulder et al., 2016; Pao et al., 2016).

53 The inclusion of an affinity tag such as hemagglutinin (HA), FLAG, biotin, etc. to the N-terminus of a ubiquitin-  
54 based probe allows for DUB enrichment by immunoprecipitation (IP). Subsequent analysis by liquid  
55 chromatography tandem mass spectrometry (LC-MS/MS) can identify and quantify cellular active DUBs bound  
56 to the probe. This method can be used in conjunction with a DUB inhibitor to identify inhibitor potency and  
57 cross-reactivity. Any DUBs that react with the inhibitor will not bind to the probe as efficiently and will be  
58 reduced in the immunoprecipitated sample when compared to a control. This method was successfully applied  
59 to demonstrate the selectivity of a USP7 inhibitor, with a 2-bromoethylamine warhead probe (HA-Ub-Br2). In  
60 this case, a panel of 22 DUBs were quantified (Turnbull et al., 2017). The ABPP assay was used also to assess  
61 cellular target engagement and DUB selectivity in crude cell extracts for small molecule inhibitors against  
62 USP9X (Clancy et al., 2020), and USP28 (Ruiz et al., 2020).

63 Without fractionation the number of DUBs immunoprecipitated and quantified by MS with a propargylamine  
64 (PA) warhead is around 30-40 (Altun et al., 2011; Ekkebus et al., 2013). To improve this methodology, we have  
65 recently combined this probe (Ub-PA) with sample fractionation and 74 DUBs in MCF-7 breast cancer cells  
66 were quantified. For comparison, the transcriptomics analysis of the same cells identified a very similar number  
67 of (78) DUB mRNAs (Pinto-Fernández et al., 2019).

68 One of the limitations of the ABPP assay is the relatively low throughput due to the complexity of the sample  
69 preparation in proteomic applications. Here, we develop methodology to apply activity-based protein profiling  
70 in conjunction with enzyme inhibitors in a high-throughput manner, allowing for rapid screening of the  
71 concentration dependence and selectivity of multiple inhibitors simultaneously. Although this workflow can  
72 be implemented for any ABP containing an affinity tag motif, we used ubiquitin based ABPs to screen cysteine  
73 protease deubiquitylating enzymes (DUBs) and a panel of small molecule inhibitors as a methodological proof  
74 of concept.

## 75 **2 Materials and Methods**

76 **Table 1: List of reagents**

| Reagent           | Source | Identifier |
|-------------------|--------|------------|
| <i>ANTIBODIES</i> |        |            |

|                                                 |                     |                       |
|-------------------------------------------------|---------------------|-----------------------|
| HA (12CA5)                                      | Roche               | 11666606001           |
| USP7 (mouse)                                    | Sigma-Aldrich       | May-46                |
| USP7 (human)                                    | ENZO                | BML-PW0540-0100       |
| GAPDH                                           | Invitrogen          | MA5-15738             |
| USP30                                           | Abcam               | ab235299              |
| <i>CHEMICALS, KITS, ENZYMES, AND OTHERS</i>     |                     |                       |
| Sucrose                                         | Alfa Aesar          | A15583                |
| Acid washed glass beads                         | Sigma-Aldrich       | G4649                 |
| Sodium Chloride                                 | Sigma-Aldrich       | S5886                 |
| Glycine                                         | Sigma-Aldrich       | G7126                 |
| Tween 20                                        | Sigma-Aldrich       | P1379                 |
| Dulbecco's modified eagle medium - high glucose | Gibco               | 11995040              |
| Eagles minimum essential medium                 | Sigma-Aldrich       | M2279                 |
| Ham's F12 Nutrient Mixture                      | Sigma-Aldrich       | N4888                 |
| Non-essential amino acids                       | Sigma-Aldrich       | M7145                 |
| Glutamax                                        | Gibco               | 35050061              |
| Fetal Bovine Serum                              | Gibco               | 10500064              |
| Ethanol                                         | Merck Life Science  | 32221                 |
| Tris Base (Trizma)                              | Sigma-Aldrich       | T1503                 |
| Magnesium chloride                              | Sigma-Aldrich       | M2670                 |
| EDTA                                            | Fischer bioreagents | 6381-92-6             |
| TFA                                             | Sigma-Aldrich       | 74564-10ML-F          |
| Urea                                            | Sigma-Aldrich       | U1250                 |
| NP-40                                           | Sigma-Aldrich       | I3021                 |
| TEAB                                            | Sigma-Aldrich       | T7408                 |
| PBS                                             | Sigma-Aldrich       | D8537                 |
| SDS                                             | Sigma-Aldrich       | 71725                 |
| Phosphoric Acid                                 | Fluka               | 79620                 |
| Formic Acid                                     | Sigma-Aldrich       | 33015                 |
| Methanol                                        | Merck Life Science  | 32213                 |
| Iodoacetamide                                   | Sigma-Aldrich       | I1149                 |
| Dithiothreitol                                  | Sigma-Aldrich       | D9779                 |
| Acetonitrile                                    | Millipore           | 1000302500            |
| Dimethyl Sulfoxide                              | Sigma-Aldrich       | 34869                 |
| Water for Chromatography                        | Millipore           | 1153332500            |
| BCA Protein Assay Kit                           | Thermo Scientific   | 23227                 |
| Trypsin                                         | Worthington         | LS003740 TPCK-treated |
| PA-W cartridges                                 | Agilent             | G5496-60000           |
| Evotips                                         | Evosep              | EV-2001               |

|                                        |                                                             |                             |
|----------------------------------------|-------------------------------------------------------------|-----------------------------|
| S-Trap Plate                           | Protifi LCC                                                 | C02-96well                  |
| 96-well microplate, U-bottom           | Greiner Bio-One Ltd                                         | 650201                      |
| <i>EXPERIMENTAL MODELS: CELL LINES</i> |                                                             |                             |
| MCF-7                                  | ATCC                                                        | HTB-22                      |
| SH-SY5Y                                | ATCC                                                        | CRL2266                     |
| <i>INSTRUMENTS</i>                     |                                                             |                             |
| Nanodrop                               | ND-1000 spectrophotometer                                   | 1000 3.8.1                  |
| <i>SOFTWARE</i>                        |                                                             |                             |
| Maxquant                               | MPI, <a href="http://www.maxquant.org">www.maxquant.org</a> | Versions 1.6.10.43 & 1.6.14 |
| Sample Prep Workbench                  | Agilent                                                     | Version 3.0.0               |
| Vworks                                 | Agilent                                                     | Version                     |
| Graph pad Prism                        | Prism 8                                                     | Version 8.4.3 (686)         |
| Excel                                  | Microsoft Office 365                                        |                             |

77

## 78 **Cell culture and lysis**

79 MCF-7 cells were cultured in Dulbecco's Modified Eagle's Medium (DMEM) with high glucose and  
80 supplemented with 10 % (v/v) Fetal Bovine Serum. SH-SY5Y cells were cultured in Eagle's Minimum Essential  
81 Medium and Ham's F12 Nutrient Mix (1:1), supplemented with 15 % (v/v) Fetal Bovine Serum, 1 % (v/v) non-  
82 essential amino acids and 2 mM Glutamax. Cells were maintained at 37 °C, 5 % CO<sub>2</sub>.

83 For cell collection and lysis, cells were washed with phosphate-buffered saline (PBS), scraped in fresh PBS and  
84 collected at 300 xg. Cells were resuspended in lysis buffer (50mM Tris Base, 5 mM MgCl<sub>2</sub> · 6 H<sub>2</sub>O, 0.5 mM EDTA,  
85 250 mM Sucrose, 1 mM Dithiothreitol (DTT), pH 7.5) and vortexed with an equal volume of acid washed glass  
86 beads 10 times for 30 seconds, with 2 minute breaks on ice. MCF-7 cells were clarified by 14,000 xg  
87 centrifugation at 4 °C for 25 minutes. SH-SY5Y cells were clarified at 600 x G at 4 °C for 10 minutes to retain  
88 USP30 bound to mitochondria. Protein concentrations were determined by BCA protein assay.

## 89 **DUB small molecule inhibitors used in this study**

90 USP7 inhibitors FT671 and FT827 (Ioannidis et al., 2016; Turnbull et al., 2017) were a kind gift from Stephanos  
91 Ioannidis. USP30 inhibitor 39 (Kluge et al., 2018), and USP30 inhibitor 3-b (patent WO2020072964) were kindly  
92 provided by Jeff Schkeryantz and Lixin Qiao (Evotec/Bristol-Meyers-Squibb). Inhibitor structures are shown in  
93 Figure S3. PR619 was purchased from Calbiochem (Cat. No. 662141), N-Ethylmaleimide from Sigma-Aldrich  
94 (Cat. No. E3876), USP7 inhibitor P22077 from Calbiochem (Cat. No. 662142), and USP7 inhibitor HBX41108  
95 from TOCRIS (Cat. No. 4285).

## 96 **Tissue collection and lysis**

97 Tissue was harvested from mice culled by exsanguination under terminal anaesthetic (isoflurane >4% in 95%O<sub>2</sub>  
98 5%CO<sub>2</sub>); depth of anaesthesia was monitored by respiration rate and withdrawal reflexes. Mice were perfused  
99 with PBS and tissue frozen at -80°C. Mouse brain was homogenized in lysis buffer used for the lysis of cultured  
100 cells, using a dounce homogenizer. Once the tissue reached a homogenous consistency the glass bead lysis  
101 protocol was carried out as outlined for cultured cells. Lysates were clarified at 600 xg at 4 °C for 10 minutes.

## 102 **Western blotting**

103 Samples were boiled in Laemmli sample buffer and separated on a Tris-glycine SDS page (4-15 % acrylamide  
104 gradient) gel. Samples were then transferred to a PVDF membrane and blocked for 1 h in 4 % milk TBST.  
105 Primary antibodies were incubated overnight at 4 °C and secondary antibodies were incubated for 1 hour at  
106 room temperature. Imaging was carried out on a LI-COR odyssey detection system.

## 107 **Probe synthesis**

108 HA-Ub-PA was synthesized as previously described (Borodovsky et al., 2002; Pinto-Fernández et al., 2019).  
109 Ubiquitin was expressed in *E.coli* (Gly76del) with an N-terminal HA tag and a C-terminal intein-chitin binding  
110 domain (CBD). *E.coli* were suspended in 50 mM Hepes, 150 mM NaCl, 0.5 mM DTT (buffer used throughout  
111 synthesis) and sonicated 10 times, 30 seconds on, 30 seconds off. Purification was carried out using Chitin bead  
112 slurry, and HA-Ub-MesNa was formed via overnight agitated incubation with 100 mM MesNa at 37 °C whilst  
113 the protein was still attached to the Chitin beads. HA-Ub-PA was formed by incubation of HA-Ub-MesNa with  
114 250 mM PA with agitation at room temperature for 20 minutes. Excess PA was removed via PD-10 column  
115 desalting. Complete and active probe formation was confirmed via anti-HA western blot and intact protein LC-  
116 MS (data not shown).

## 117 **Probe and inhibitor labelling**

118 Lysates were diluted to 3.33 mg/ml using lysis buffer (minus the volume of the inhibitor and probe). Inhibitors  
119 were diluted with either DMSO (or ethanol in the case of NEM) to the same volume for their concentration  
120 dependence. 3-b, 39, FT671 and NEM were incubated with cell/tissue lysates for 1 hour at 37 °C. Probe was  
121 incubated with lysate at a ratio of 1:200 (w/w) for 45 minutes at 37 °C in all conditions, except for with USP7  
122 (10 minute incubation) due to long probe incubations displacing bound inhibitor in this case. Reactions were  
123 quenched by addition of SDS to 0.4 % (w/v) and NP40 to 0.5 % (v/v) and made to 1 mg/ml protein concentration  
124 by addition of NP40 buffer (50 mM Tris, 0.5 % NP40 (v/v), 150 mM NaCl, 20 mM MgCl<sub>2</sub>, pH 7.4) (freezing at  
125 this point had no effect on the result of the subsequent IP).

## 126 **Immunoprecipitation with Agilent Bravo AssayMAP liquid handling robot**

127 Anti-HA (12CA5) antibody (Roche) was immobilized on Protein A (PA-W) cartridges (Agilent, G5496-60000),  
128 using the Immobilization App (Agilent Sample Prep Workbench v3.0.0). All steps use PBS buffer (Sigma-  
129 Aldrich). Cartridges were primed with 100 µL (at 300 µL/min) and equilibrated with 50 µL (at 10 µL/min)  
130 followed by loading of 100 µg antibody (or otherwise as stated) in a final volume of 50 µL PBS buffer at 3  
131 µL/min. A cup wash with 50 µL and an internal cartridge wash step (100 µL at 10 µL/min) were performed  
132 before re-equilibrating the cartridges with 50 µL at 10 µL/min).

133 The Affinity Purification App was used for pull-downs. Briefly, Protein A cartridges with immobilized anti-HA  
134 antibody were primed (100 µL at 300 µL/min) and equilibrated (50 µL at 10 uL/min) with NP-40 buffer, which  
135 was also used for all following steps. The sample was loaded at a flow-rate of 1 µL/min. After sample loading  
136 the cup was washed (50 µL) and an internal cartridge wash step (100 uL at 10 µL/min) performed to remove  
137 unbound lysate. Peptides were eluted using 50 µL at 5 µL/min 6M Urea or 0.15% TFA or 5 % SDS.

## 138 **Mass spectrometry sample preparation and analysis**

139 Urea and TFA eluates were diluted/neutralized with 180 µL 100 mM TEAB. Samples were digested in solution  
140 with 1 µg Trypsin (Worthington, LS003740 TPCK-treated Trypsin) over night at 37 C. Digestion was stopped by  
141 acidification to final concentration of 1% formic acid.

142 SDS eluates were prepared following an S-Trap 96-well plate (Protifi LLC, C02-96well) protocol. Eluates were  
143 acidified with ~12% phosphoric acid (10:1 v/v) and loaded into the S-trap containing 350  $\mu$ L 90% MeOH in 100  
144 mM TEAB and spun at 1500x g for 1 min. This step was repeated three times. Then samples were resuspended  
145 in 100  $\mu$ L 100 mM TEAB with 1  $\mu$ g Trypsin (Worthington) and digested over night at 37 C. Samples were eluted  
146 from the S-traps in three consecutive steps, each for 1 min at 1500x g, first with 50  $\mu$ L 50 mM TEAB, then 50  
147  $\mu$ L 0.1% TFA and finally 50  $\mu$ L 50% ACN /0.1% TFA. The combined eluates were dried down in a vacuum  
148 centrifuge and resuspended in 2% ACN / 0.1% TFA for LC-MS.

#### 149 **LC-MS data acquisition**

150 Samples were either run on a LC-MS setup comprised of an Evosep One coupled to a Bruker timsTOF Pro or a  
151 Dionex Ultimate3000 coupled to a Thermo Q Exactive Classic.

152 Evotips (Evosep) were prepared and loaded with peptides as described by the manufacturer. Briefly, Evotips  
153 were activated by soaking in isopropanol and primed with 20  $\mu$ L buffer B (ACN, 0.1% FA) by centrifugation for  
154 1 min at 700g. Tips were soaked in isopropanol a second time and equilibrated with 20  $\mu$ L buffer A (water,  
155 0.1% FA) by centrifugation. 20  $\mu$ L buffer A were loaded onto the tips and the samples were added. Tips were  
156 spun and then washed with 20  $\mu$ L buffer A followed by overlaying the C18 material in the tips with 100  $\mu$ L  
157 buffer A and a short 20 s spin.

158 Peptides were separated on an 8 cm analytical C18 column (PepSep, EV-1109, 3 $\mu$ m beads, 100  $\mu$ m ID) using  
159 the pre-set 100 samples per day gradient on the Evosep One. MS data was acquired in PASEF mode (oTOF  
160 control 6.2.105 / HyStar 5.1.8.1) in a mass range of 100 -1700 m/z with 4 PASEF frames (3 cycles overlap). The  
161 ion mobility window was set from 1/k0 0.85 Vs/cm<sup>2</sup> to 1.3 Vs/cm<sup>2</sup>, ramp time 100 ms with locked duty cycle.

162 On the Orbitrap setup comprised of a Dionex Ultimate 3000 nano LC with Thermo Q Exactive Classic peptides  
163 were separated on a 50-cm EasySpray column (Thermo Fisher, ES803, 2  $\mu$ m beads, 75- $\mu$ m ID) with a 60 minute  
164 gradient of 2 to 35% acetonitrile in 0.1% formic acid and 5% DMSO at a flow rate of 250 nL/min.

165 MS1 spectra were acquired with a resolution of 70,000 and AGC target of 3e6 ions for a maximum injection  
166 time of 100 ms. The Top15 most abundant peaks were fragmented after isolation with a mass window of 1.6  
167 Th at a resolution of 17,500 with a maximum injection time of 128 ms. Normalized collision energy was 28%  
168 (HCD).

169 Data for experiment in Figure S1D was generated as follow: Samples of the lysate titration on cartridge have  
170 been run on a timsTOF Pro (OtofControl 6.0.115 / HyStar 5.0.37.1) coupled to a Dionex Ultimate 3000 on a 15  
171 cm IonOpticks Aurora series column (1.6  $\mu$ m beads, 75  $\mu$ m ID, Ionopticks AUR2-15075C18A) at a flow rate of  
172 400 nL/min. The gradient started for 3 min at 2% B increasing linearly in 17 min to 30% B followed by ramping  
173 up to 95% for 1 min and re-equilibration to 2% B. Data has been acquired in PASEF mode as described above.

174 Data in Figure 5 with compounds FT671, FT827, HBX41108, P22077, 3-b, 39, and PR619 has been acquired on  
175 a 100 samples per day gradient on a 8 cm Pepsep column (1.5  $\mu$ m beads, 150  $\mu$ m ID, PepSep, PSC-8-150-15-  
176 UHP-nC) with PASEF data acquisition as described above.

#### 177 **Maxquant analysis**

178 Orbitrap raw data was searched in Maxquant 1.6.10.43, timsTOF data was searched in Maxquant 1.6.14. MCF-  
179 7 and SHSY5Y cell samples against a reviewed Homo sapiens Uniprot database (retrieved 31-Dec 2018), mouse  
180 brain against a reviewed Mus musculus Uniprot database (retrieved 17-Oct 2020).



181 Maxquant default settings have been used with oxidation of methionine residues and acetylation of the  
182 protein N-termini set as variable modifications and carbamidomethylation of cysteine residues as fixed  
183 modification. The match between runs feature was used for all analyses.

184 Raw data and Maxquant search results have been deposited to PRIDE with the identifier PXD023036.

### 185 **Data analysis**

186 Graphs were generated and fitted using Graphpad Prism version 8.4.3 (686). All intensities from mass  
187 spectrometry experiments are LFQ (label-free quantitative) intensities unless otherwise stated. DUBs were  
188 filtered and removed based off presence in a no probe control sample, missing values in the probe control  
189 sample, or intensity values that were at the bottom limit of the MS dynamic range.

## 190 **3 Results**

### 191 **ABBP-HT workflow optimization**

192 Each stage of the high-throughput IP methodology outlined in **Figure 1**, was optimized for maximal DUB  
193 identification coverage with minimal material to reduce experimental cost/time. Different starting material  
194 type and concentration, probe labeling, immunoaffinity purification, elution, and sample preparation  
195 conditions were tested and optimized.

196 First, we decided to identify the ideal ratio of probe to protein in the lysate by incubating increasing  
197 concentration of the probe with a fixed amount of lysate. Note: this step should be carried out every time after  
198 changing the batch of ABP. Our results (shown in **Figure S1A**) suggested that we should use at least 0.25  $\mu\text{g}$  of  
199 HA-Ub-PA probe to label efficiently 50  $\mu\text{g}$  protein extracts from two different cell lines, MCF-7 and SH-SY5Y.

200 In parallel, we also determined the best antibody concentration for immunoprecipitation. Anti-HA antibody  
201 was loaded onto Protein A cartridges as a set volume of 50  $\mu\text{l}$  at a flow rate of 3  $\mu\text{g}/\mu\text{L}$ . The column was then  
202 washed with 100  $\mu\text{L}$  of PBS buffer. From this, the loading and washing flow through fractions were collected,  
203 and unbound antibody was detected by 280 nm Nanodrop measurements. Whilst residual amounts of protein  
204 were detected at low concentrations, a significant amount of protein was present when 90  $\mu\text{g}$  was loaded,  
205 suggesting the column saturates between 80-90  $\mu\text{g}$  of antibody (**Figure S1B**). From this, we concluded that  
206 above 80-90  $\mu\text{g}$  of antibody saturates all column binding sites.

207 Using cartridges primed with 80  $\mu\text{g}$  of HA antibody, a concentration dependence was also carried out using  
208 varying amounts of HA-Ub-PA probe which was diluted to a set volume of 25  $\mu\text{L}$  and loaded at a flowrate of 3  
209  $\mu\text{L}/\text{min}$ . The presence of probe in the loading and washing flow-through fractions was detected by anti-HA  
210 immunoblotting. Unbound probe was detected both in loading and washing flow-through fractions when  $\geq 5$   
211  $\mu\text{g}$  of probe was flowed through the column (**Figure S1C**). Therefore, no more than 2-5  $\mu\text{g}$  of probe should be  
212 loaded to avoid column saturation and material waste.

213 In order to identify the optimal amount of labelled lysate we performed an LC-MS/MS analysis after performing  
214 IAP-MS with different amounts of labelled lysate, using the parameters described above. The results (**Figure**  
215 **2A**) showed that 250  $\mu\text{g}$  of labelled lysate gives us the maximum of DUB identifications (IDs). Analysis of the  
216 flow through by immunoblotting of USP7 confirmed these results (**Figure 2B**, **Figure S1D**, and **Figure S2**).

217 The next step was to optimize the elution of the immunoprecipitated material from the column, the digestion  
218 method, and the LC-MS/MS instrumentation. Various elution/digestion methods were trialed. Initially 6 M  
219 Urea or 0.15 % TFA were used to elute the proteins for digestion and MS analysis. An on-column trypsin

220 digestion of the protein was also carried out in the presence of either HEPES buffer or 0.15 % TFA. Samples  
221 were then run on a Q Exactive Orbitrap mass spectrometer and quantified using the search software  
222 Maxquant. From this, the most efficient elution was 0.15 % TFA in combination with in-solution trypsin  
223 digestion. Different elution methods followed by in-solution digestions were then trialed on an Evosep (liquid  
224 chromatography; LC) and timsTOF Pro (mass spectrometry; MS). Comparison of 5 % SDS, 0.15 % TFA and 6M  
225 urea using this instrumentation demonstrated that 0.15% TFA is again the most efficient elution for the  
226 identification and quantification of the highest number of DUBs (**Figure 2C-E**).

227 The combined use of short gradients on an Evosep LC and the fast scan speeds using Parallel Accumulation  
228 Serial Fragmentation (PASEF) data acquisition on a timsTOF Pro allowed for increased sample throughput.  
229 With the preset gradients on the Evosep throughput ranges from 30-300 samples per day (SPD), compared to  
230 the 6-12 SPD of common nanoflow LC setups or 9 SPD on our in-house 1 h gradient. In this experimentation  
231 100 SPD is used as standard, with no increase in DUBs identified occurring from a 60 SPD method (data not  
232 shown). Additionally, comparison of the Evosep One with a nanoflow LC coupled to the timsTOF Pro resulted  
233 in no marked difference in the number of identified DUBs (23 vs 22 respectively) on comparable gradient  
234 lengths. There is ~ 20% reduction in the number of DUBs identified with the TFA elution using the  
235 Evosep/timsTOF compared to an Orbitrap MS (**Figure 2D** and **Figure 2E**) at highly reduced instrument time  
236 (single run ~15 min vs 160 min). Both instruments lead to the identification of a similar panel of DUBs, with  
237 some DUBs unique to each. The choice between the two instruments should balance the required DUBome  
238 coverage vs throughput, and whether detection of the desired DUB is feasible with the chosen methodology.

239 Finally, since one of the applications of this methodology is DUB inhibitor characterization there is an aspect  
240 of the ABP assay that should be considered before testing a given inhibitor: Probe incubation time. Ub-based  
241 activity-based probes, especially with the highly reactive PA (propargylamide) warhead can displace both,  
242 covalent and non-covalent, DUB inhibitors over time. As shown in **Figures 2F** and **2G** for two different USP30  
243 inhibitors, the reversible covalent 3-b and the reversible non-covalent 39. Increasing the incubation time  
244 displaced the inhibitors, especially 3-b, from the DUB, giving the impression that the inhibitor is less potent.  
245 Therefore, for reversible inhibitors we suggest minimizing incubation times with the probe. Of course, this has  
246 an impact on the number of DUBs identified when performing the ABPP assay. We compared two labelling  
247 times using our ABPP-HT workflow and as expected, the intensities of some DUBs are clearly reduced when  
248 the lysate is incubated with probe for a shorter period of time (10 minutes versus 45; **Figure 2 H**). These  
249 optimization steps were summarized in **Figure 2I**.

#### 250 **Guide to DUB picking: abundance changes with methodology and starting material source.**

251 These conditions were then applied to characterize the active DUBome in two different cell lines, MCF-7 and  
252 SH-SY5Y, and brain tissue material from mice. We also included the data using the two different LC-MS/MS  
253 instrumentations: Nanoflow liquid chromatography coupled to an Orbitrap MS (OT on the figures) and  
254 microflow (Evosep) liquid chromatography and ion mobility-mass spectrometer, timsTOF (TT on the figures).  
255 We summarized the results in a heat map (**Figure 3**), displaying the normalized intensities of the identified  
256 DUBs when using different cell lines, tissue, and instrumentation. This together with the heat maps describing  
257 the different elution methods (**Figures 2D** and **2E**) should be a good reference when studying a particular DUB  
258 and its potential inhibitors. For example, there are some DUBs that are only identified in the cancer cells like  
259 USP3, USP4, and OTUD7B. On the other hand, there are DUBs specific for brain tissue and cells like UCHL1.

#### 260 **Proof of concept: Broad and specific DUB inhibitor concentration dependences and cross-reactivities**



261 The ABPP-HT methodology is able to identify a representative panel of DUBs that is comparable to the regular  
262 ABPP (~15-25 vs ~30-40) (Pinto-Fernández et al., 2019). With this representative panel we applied the  
263 methodology to check for compatibility with DUB inhibitor characterization. In order to do so, we performed  
264 ABPP-HT with the highly selective USP7 inhibitor FT671 (Turnbull et al., 2017) and with the broad cysteine  
265 modifier NEM (n-ethylmaleimide) (Pinto-Fernández et al., 2019). We performed these experiments treating  
266 lysates from MCF-7 cells and from mouse brain tissue extracts with different concentrations of the inhibitors.  
267 We used the TT LC-MS/MS instrumentation as it is more suitable for testing a higher number of compounds.  
268 First, we performed control immunoblots against USP7, to show the effects of the compounds on USP7, and  
269 against the probe (anti-HA), to visualize the selectivity of the compounds. FT671 inhibits USP7 in both, cell line  
270 (**Figure 4A**) and brain tissue (**Figure 4B**), however, due to the USP7 antibody recognizing USP7 with and without  
271 its previously characterized ubiquitination (Fernández-Montalván et al., 2007), in the mouse tissue this effect  
272 was more challenging to visualize. At the same time, the HA blot showed little reactivity of FT671 with other  
273 labelled DUBs. On the other hand, NEM was also inhibiting USP7 in both cells (**Figure 4C**) and brain (**Figure 4D**),  
274 however, in a non-selective way as shown by the overall decrease in HA signal at high concentrations of the  
275 compound. These observations were highly comparable when processing these samples on our ABPP-HT  
276 workflow. For instance, immunoblot densitometry of labelled USP7 with increasing amounts of FT671  
277 correlates to a similar degree with the LC-MS/MS data (MCF-7 on **Figure 4E** and brain on **Figure 4G**). This was  
278 also the case for the selectivity profile of the two compounds in both cells and brain (**Figures 4F, 4H, 4I, and**  
279 **4J**), reflecting well both, the expected high selectivity of FT671 and the broad inhibition by NEM.

#### 280 **Exploiting the possibilities of the ABPP-HT methodology: multiple compound characterization in different** 281 **cell lines and tissue**

282 Finally, we decided to gain advantage of the ABPP-HT possibilities and applied the methodology to a number  
283 of compounds (structures in **Figure S3**) and concentrations simultaneously. Here, critical target engagement  
284 information was obtained in a cellular context, in a much faster way than the current methodology. We tested  
285 different concentrations of four USP7 inhibitors, FT671, FT827 (Turnbull et al., 2017), HBX41108 (Colland et  
286 al., 2009), P22077 (Altun et al., 2011), two USP30 inhibitors (3-b and 39), and the two broad cysteine modifiers  
287 NEM (Pinto-Fernández et al., 2019) and PR619 (Altun et al., 2011). The results are summarized on separated  
288 heat maps for USP7 inhibitors (**Figure 5A**), USP30 (**Figure 5B**) and non-selective (**Figure 5C**), and bar graphs  
289 (**Figures S4E-H**). These results not only match the matching control immunoblots in **Figure S4 (A-D)** but also  
290 previously reported information. For instance, P22077 was reported to be a dual USP7/USP47 inhibitor (Altun  
291 et al., 2011) and the same result could be seen in our data (**Figure 5A**). FT671 and FT827 were reported to be  
292 highly selective, and potent, USP7 inhibitors (Turnbull et al., 2017) and this still applied when using our ABPP-  
293 HT workflow (**Figure 5A**). HBX41108 selectivity data has not been reported, although our results suggested a  
294 not very selective profile. The USP30 inhibitors showed a nice dose-dependent inhibition of the target and  
295 good selectivity profiles, especially for the USP30 inhibitor 39 (**Figure 5B**). Finally, the two cysteine modifiers  
296 behaved as expected (Altun et al., 2011) (Pinto-Fernández et al., 2019), inhibiting all the identified DUBs at  
297 high concentrations (**Figure 5C**). The ability to analyze multiple concentrations also allowed for the plotting  
298 and determination of the half-maximal inhibitory concentrations (IC50s) for each inhibitor in the described  
299 conditions (**Figure 5D-J**).

## 300 **4 Discussion**

301 There are numerous methods to study the potency and selectivity of an enzyme inhibitor using recombinant  
302 purified proteins, and their substrates, in biochemical assays. However, these assays cannot assess the activity  
303 of an inhibitor in a more relevant context such as cell lysates, intact cells or tissue. Degradation, limited

304 permeability, or cross-reactivity of an inhibitor in the cellular environment may lead to reduced potency and  
305 off-target effects. Consequently, it is important to be able to screen potential inhibitors within this  
306 environment. ABPP assays can provide all of these very relevant parameters, however, if we want to apply this  
307 technique to a screen of inhibitors with varying concentrations in different cell types, the throughput needs to  
308 be increased.

309 Here, we describe a new ABPP methodology, named ABPP-HT (high-throughput-compatible activity-based  
310 protein profiling), that allowed the semi-automated analysis of samples in a microplate format, addressing the  
311 low throughput associated to the classic ABPP assay. The incorporation of a liquid handling robot compatible  
312 with IAP-MS, and the Evosep/timsTOF LC-MS/MS instrumentation, were key to boost the throughput of the  
313 ABPP up to ten times in a cost-effective way. The depth of this method is reduced but comparable to the  
314 normal ABPP, with the detection of ~15-25 DUBs when using the ABPP-HT versus ~30-40 DUBs with the original  
315 ABPP. The number of DUBs that are reactive with the probe and can be potentially detected by ABPP is higher  
316 than 70, but this requires performing a high-pH pre-fractionation of the samples prior LC-MS/MS analysis  
317 (Pinto-Fernández et al., 2019). This drastically increases the number of samples to analyze per condition and  
318 therefore the required time and cost of the assay. This comparative information has been summarized in  
319 **Figure 6**. The methodology of the ABPP-HT approach can be applied as a powerful initial screening tool for  
320 multiple inhibitors at different concentrations, in various cell lines, to discard weak or highly cross-reactive  
321 inhibitors quickly and robustly. From this, only potent and selective inhibitors could be taken forward for more  
322 thorough characterization using the original or fractionated ABPP approaches.

323 As a proof of concept, we demonstrated the versatility of this methodology using general and specific DUB  
324 inhibitors in two different cell lines and mouse brain tissue. ABPP-HT permitted the simultaneous analysis of 6  
325 selective DUB inhibitors and the calculation of their respective half maximal inhibitory concentration (IC50)  
326 values. The methodology has the capacity to simultaneously test a much higher number of inhibitors and  
327 concentrations. We also believe that the throughput of the ABPP-HT can be increased even further. For  
328 example, by implementing chemical labels, such as TMT (tandem mass tag) that would allow the combination  
329 of up to 16 samples into one and therefore providing multiplexing capabilities and enhanced throughput.  
330 Another area where the sensitivity and therefore DUB coverage of this type of analysis could be further  
331 improved is by implementing targeted proteomics methods such as Data-Independent Acquisition (DIA) mass  
332 spectrometry. For instance, DIA has been successfully applied for ubiquitomics and discussed by Vere et al.  
333 (Vere et al., 2020).

334 In conclusion, ABPP-HT (high-throughput-compatible activity-based protein profiling) was conceptualized,  
335 optimized, and validated. When tested, the approach allowed for reduced time and cost for both sample  
336 preparation and MS time, whilst still identifying and quantifying a representative panel of endogenously  
337 expressed DUBs, enabling the profiling of a number of DUB inhibitors.

## 338 **5 Conflict of Interest**

339 *The authors declare that the research was conducted in the absence of any commercial or financial*  
340 *relationships that could be construed as a potential conflict of interest.*

## 341 **6 Author Contributions**

342 H.J., R.F., B.M.K. and A.P.F. directed this study. Most experiments were devised by H.J., R.H., B.M.K. and A.P.F.  
343 and carried out by H.J, R.H. and A.P.F. H.J., R.H., B.M.K. and A.P.F. wrote the paper. All authors commented on  
344 the text.

## 345 **7 Funding**

346 Work in the BMK lab was funded by Bristol Myers Squibb, Pfizer Inc., by an EPSRC grant EP/N034295/1 and by  
347 the Chinese Academy of Medical Sciences (CAMS) Innovation Fund for Medical Science (CIFMS), China (grant  
348 number: 2018-I2M-2-002).

## 349 **8 Acknowledgments**

350 We would like to thank the Discovery Proteomics Facility (led by Dr Roman Fischer) at the Target Discovery  
351 Institute (Oxford) for expert help with the analysis by mass spectrometry. We would also like to thank Jeffrey  
352 M. Schkeryantz (Bristol-Myers Squibb Research and Development), Lixin Qiao (Bristol-Myers Squibb Research  
353 and Development), and Katherine England (ARUK Oxford Drug Discovery Institute ODDI) for kindly providing  
354 the USP30 inhibitor compounds 39 and 3-b'. Finally, brain tissue material was kindly provided by Gillian  
355 Douglas (Division of Cardiovascular Medicine, Radcliffe Department of Medicine, University of Oxford).

## 356 **9 References**

357 Altun, M., Kramer, H. B., Willems, L. I., McDermott, J. L., Leach, C. A., Goldenberg, S. J., et al. (2011). Activity-  
358 based chemical proteomics accelerates inhibitor development for deubiquitylating enzymes. *Chem.*  
359 *Biol.* 18, 1401–1412. doi:10.1016/j.chembiol.2011.08.018.

360 Arthur, K., Bharat, L., Pranab, M., and Sunil, K. P. (2018). Usp30 inhibitors.

361 Bennis, H. J., Wincott, C. J., Tate, E. W., and Child, M. A. (2021). Activity- and reactivity-based proteomics:  
362 Recent technological advances and applications in drug discovery. *Curr. Opin. Chem. Biol.* 60, 20–29.  
363 doi:10.1016/j.cbpa.2020.06.011.

364 Borodovsky, A., Kessler, B. M., Casagrande, R., Overkleeft, H. S., Wilkinson, K. D., and Ploegh, H. L. (2001). A  
365 novel active site-directed probe specific for deubiquitylating enzymes reveals proteasome association  
366 of USP14. *EMBO J.* 20, 5187–5196. doi:10.1093/emboj/20.18.5187.

367 Borodovsky, A., Ovaa, H., Kolli, N., Gan-Erdene, T., Wilkinson, K. D., Ploegh, H. L., et al. (2002). Chemistry-  
368 based functional proteomics reveals novel members of the deubiquitinating enzyme family. *Chem. Biol.*  
369 9, 1149–1159. doi:10.1016/S1074-5521(02)00248-X.

370 Chakrabarty, S., Kahler, J. P., van de Plassche, M. A. T., Vanhoutte, R., and Verhelst, S. H. L. (2019). “Recent  
371 advances in activity-based protein profiling of proteases,” in *Current Topics in Microbiology and*  
372 *Immunology* (Springer Verlag), 253–281. doi:10.1007/82\_2018\_138.

373 Chen, X., Wong, Y. K., Wang, J., Zhang, J., Lee, Y. M., Shen, H. M., et al. (2017). Target identification with  
374 quantitative activity based protein profiling (ABPP). *Proteomics* 17. doi:10.1002/pmic.201600212.

375 Clague, M. J., Urbé, S., and Komander, D. (2019). Breaking the chains: deubiquitylating enzyme specificity  
376 begets function. *Nat. Rev. Mol. Cell Biol.* 20, 338–352. doi:10.1038/s41580-019-0099-1.

377 Clancy, A., Heride, C., Pinto-Fernández, A., Kallinos, A., Kayser-Bricker, K., Wang, W., et al. (2020). The

- 378 deubiquitylase USP9X controls ribosomal stalling.  *biorxiv.org*. doi:10.1101/2020.04.15.042291.
- 379 Colland, F., Formstecher, E., Jacq, X., Reverdy, C., Planquette, C., Conrath, S., et al. (2009). Small-molecule  
380 inhibitor of USP7/HAUSP ubiquitin protease stabilizes and activates p53 in cells.  *Mol. Cancer Ther. 8*,  
381 2286–2295. doi:10.1158/1535-7163.MCT-09-0097.
- 382 Deng, H., Lei, Q., Wu, Y., He, Y., and Li, W. (2020). Activity-based protein profiling: Recent advances in  
383 medicinal chemistry.  *Eur. J. Med. Chem. 191*. doi:10.1016/j.ejmech.2020.112151.
- 384 Ekkebus, R., Van Kasteren, S. I., Kulathu, Y., Scholten, A., Berlin, I., Geurink, P. P., et al. (2013). On terminal  
385 alkynes that can react with active-site cysteine nucleophiles in proteases.  *J. Am. Chem. Soc. 135*, 2867–  
386 2870. doi:10.1021/ja309802n.
- 387 El Oualid, F., Merckx, R., Ekkebus, R., Hameed, D. S., Smit, J. J., De Jong, A., et al. (2010). Chemical synthesis of  
388 ubiquitin, ubiquitin-based probes, and diubiquitin.  *Angew. Chemie - Int. Ed. 49*, 10149–10153.  
389 doi:10.1002/anie.201005995.
- 390 Fernández-Montalván, A., Bouwmeester, T., Joberty, G., Mader, R., Mahnke, M., Pierrat, B., et al. (2007).  
391 Biochemical characterization of USP7 reveals post-translational modification sites and structural  
392 requirements for substrate processing and subcellular localization.  *FEBS J. 274*, 4256–4270.  
393 doi:10.1111/j.1742-4658.2007.05952.x.
- 394 Hameed, D. S., Sapmaz, A., Burggraaff, L., Amore, A., Slingerland, C. J., Westen, G. J. P., et al. (2019).  
395 Development of Ubiquitin-Based Probe for Metalloprotease Deubiquitinases.  *Angew. Chemie Int. Ed.*  
396 58, 14477–14482. doi:10.1002/anie.201906790.
- 397 Harrigan, J. A., Jacq, X., Martin, N. M., and Jackson, S. P. (2018). Deubiquitylating enzymes and drug  
398 discovery: Emerging opportunities.  *Nat. Rev. Drug Discov. 17*, 57–77. doi:10.1038/nrd.2017.152.
- 399 Hershko, A., and Ciechanover, A. (1992). The ubiquitin system for protein degradation.  *Annu. Rev. Biochem.*  
400 61, 761–807. doi:10.1146/annurev.bi.61.070192.003553.
- 401 Hewings, D. S., Flygare, J. A., Bogyo, M., and Wertz, I. E. (2017). Activity-based probes for the ubiquitin  
402 conjugation–deconjugation machinery: new chemistries, new tools, and new insights.  *FEBS J. 284*,  
403 1555–1576. doi:10.1111/febs.14039.
- 404 Huang, X., and Dixit, V. M. (2016). Drugging the undruggables: exploring the ubiquitin system for drug  
405 development.  *Cell Res. 26*, 484–498. doi:10.1038/cr.2016.31.
- 406 Ioannidis, S., Talbot, A., Follows, B., Buckmelter, A., Wang, M., and Campbell, A.-M. (2016). Pyrrolotriazinone  
407 and Imidazotriazinone derivatives as ubiquitin-specific protease 7 (usp7) inhibitors for the treatment of  
408 cancer.
- 409 Kluge, A. F., Lagu, B. R., Maiti, P., Jaleel, M., Webb, M., Malhotra, J., et al. (2018). Novel highly selective  
410 inhibitors of ubiquitin specific protease 30 (USP30) accelerate mitophagy.  *Bioorganic Med. Chem. Lett.*  
411 28, 2655–2659. doi:10.1016/j.bmcl.2018.05.013.
- 412 Komander, D., Clague, M. J., and Urbé, S. (2009). Breaking the chains: Structure and function of the  
413 deubiquitinases.  *Nat. Rev. Mol. Cell Biol. 10*, 550–563. doi:10.1038/nrm2731.
- 414 Lai, A. C., and Crews, C. M. (2017). Induced protein degradation: An emerging drug discovery paradigm.  *Nat.*  
415  *Rev. Drug Discov. 16*, 101–114. doi:10.1038/nrd.2016.211.

- 416 Mathur, S., Fletcher, A. J., Branigan, E., Hay, R. T., and Virdee, S. (2020). Photocrosslinking Activity-Based  
417 Probes for Ubiquitin RING E3 Ligases. *Cell Chem. Biol.* 27, 74–82.e6.  
418 doi:10.1016/j.chembiol.2019.11.013.
- 419 Mukhopadhyay, D., and Riezman, H. (2007). Proteasome-independent functions of ubiquitin in endocytosis  
420 and signaling. *Science (80-. )*. 315, 201–205. doi:10.1126/science.1127085.
- 421 Mulder, M. P. C., Witting, K., Berlin, I., Pruneda, J. N., Wu, K. P., Chang, J. G., et al. (2016). A cascading  
422 activity-based probe sequentially targets E1-E2-E3 ubiquitin enzymes. *Nat. Chem. Biol.* 12, 523–530.  
423 doi:10.1038/nchembio.2084.
- 424 Nguyen, C., West, G. M., and Geoghegan, K. F. (2017). “Emerging methods in chemoproteomics with  
425 relevance to drug discovery,” in *Methods in Molecular Biology* (Humana Press Inc.), 11–22.  
426 doi:10.1007/978-1-4939-6539-7\_2.
- 427 Niphakis, M. J., and Cravatt, B. F. (2014). Enzyme Inhibitor Discovery by Activity-Based Protein Profiling.  
428 *Annu. Rev. Biochem.* 83, 341–377. doi:10.1146/annurev-biochem-060713-035708.
- 429 Pao, K. C., Stanley, M., Han, C., Lai, Y. C., Murphy, P., Balk, K., et al. (2016). Probes of ubiquitin E3 ligases  
430 enable systematic dissection of parkin activation. *Nat. Chem. Biol.* 12, 324–331.  
431 doi:10.1038/nchembio.2045.
- 432 Perez-Riverol, Y., Csordas, A., Bai, J., Bernal-Llinares, M., Hewapathirana, S., Kundu, D. J., et al. (2019). The  
433 PRIDE database and related tools and resources in 2019: Improving support for quantification data.  
434 *Nucleic Acids Res.* 47, D442–D450. doi:10.1093/nar/gky1106.
- 435 Pinto-Fernández, A., Davis, S., Schofield, A. B., Scott, H. C., Zhang, P., Salah, E., et al. (2019). Comprehensive  
436 Landscape of Active Deubiquitinating Enzymes Profiled by Advanced Chemoproteomics. *Front. Chem.* 7,  
437 592. doi:10.3389/fchem.2019.00592.
- 438 Popovic, D., Vucic, D., and Dikic, I. (2014). Ubiquitination in disease pathogenesis and treatment. *Nat. Med.*  
439 20, 1242–1253. doi:10.1038/nm.3739.
- 440 Ruiz, J., Pinto-Fernandez, A., Turnbull, A., Lan, L., Charlton, T., Scott, H. C., et al. (2020). USP28 deletion and  
441 small molecule inhibition destabilises c-Myc and elicits regression of squamous cell lung carcinoma.  
442 doi:10.1101/2020.11.17.377705.
- 443 Turnbull, A. P., Ioannidis, S., Krajewski, W. W., Pinto-Fernandez, A., Heride, C., Martin, A. C. L., et al. (2017).  
444 Molecular basis of USP7 inhibition by selective small-molecule inhibitors. *Nature* 550, 481–486.  
445 doi:10.1038/nature24451.
- 446 Vere, G., Kealy, R., Kessler, B. M., and Pinto-Fernandez, A. (2020). Ubiquitomics: An overview and future.  
447 *Biomolecules* 10, 1–22. doi:10.3390/biom10101453.
- 448 Wang, S., Tian, Y., Wang, M., Wang, M., Sun, G. B., and Sun, X. B. (2018). Advanced activity-based protein  
449 profiling application strategies for drug development. *Front. Pharmacol.* 9.  
450 doi:10.3389/fphar.2018.00353.

451

## 452 Data Availability Statement



453 The mass spectrometry proteomics data have been deposited to the ProteomeXchange Consortium via the  
454 PRIDE (Perez-Riverol et al., 2019) partner repository with the data set identifier PXD023036.

#### 455 **Ethical Statement for studies involving animal subjects**

456 The breeding of mice was carried out in accordance with Animal [Scientific Procedures] Act 1986, with  
457 procedures reviewed by the University of Oxford clinical medicine animal care and ethical review body  
458 (AWERB), and conducted under project licenses PPL POC27F69A. All procedures conformed to the Directive  
459 2010/63/EU of the European Parliament.

460 Tissue was harvested from mice culled by exsanguination under terminal anaesthetic (isoflurane >4% in 95%O<sub>2</sub>  
461 5%CO<sub>2</sub>); depth of anaesthesia was monitored by respiration rate and withdrawal reflexes. Mice were perfused  
462 with PBS and tissue frozen at -80°C.

#### 463 **Figure legends**

464

465 **Figure 1. Accelerated DUB inhibitor ABP IP workflow.** **A.** Protein extraction and inhibitor treatment of either  
466 intact or lysed tissue/cell lines. **B.** HA-Ub-PA probe incubation to label uninhibited cysteine active DUBs. **C.**  
467 Anti-HA IP, traditionally with centrifugation or magnetic collection of agarose beads in a low throughput  
468 format. In this work the throughput is increased to a 96 well plate format using an Agilent bravo liquid handling  
469 platform. **D.** LC-MS/MS proteomic analysis of immunoprecipitated DUBs. Here we compare the depth of the  
470 DUBome obtained using a QE orbitrap vs. a high-throughput timsTOF.

471

472 **Figure 2. Optimizing the ABPP-HT workflow.** **A.** Number of DUBS identified by timsTOF MS with increasing  
473 amounts of HA-Ub-PA-labelled MCF-7 lysate protein, after immunoprecipitation and elution with 0.15 % TFA.  
474 **B.** Western blot densitometry quantification (full blot in Figure S1D) of USP7 in the immunoprecipitation  
475 loading flow-through, with increasing amounts of HA-Ub-PA-labelled MCF-7 lysate protein quantity  
476 immunoprecipitated and eluted with 0.15 % TFA. **C.** Number of DUBs identified by LC-MS/MS with different IP  
477 elutions: 0.15 % TFA, 6 M urea, HEPES, \*= On column digestion. **D.** Log<sub>2</sub> intensities of DUBS identified with  
478 different elution methods by a QE orbitrap MS. 0.15 % TFA, 6 M urea, HEPES, \*= On column digestion. **E.** Log<sub>2</sub>  
479 intensities of DUBs identified with different elution methods by a timsTOF MS. 0.15 % TFA, 6 M urea, 5 % SDS.  
480 **F.** USP30 immunoblots showing mouse brain lysate displacement of a covalent (3-b) and non-covalent (39)  
481 USP30 inhibitor with increasing HA-Ub-PA (at 37 °C) incubation times. **G.** The densitometric quantification of  
482 Figure 2F from the intensity of the HA-Ub-PA-labelled band, normalised to the intensity of both USP30 bands  
483 together. **H.** timsTOF DUB intensities of MCF-7 labelled with HA-Ub-PA for 10 minutes normalised to 45  
484 minutes at 37 °C (SEM, n=3). **I.** Optimisation workflow for high-throughput DUB inhibitor screening using ABPP  
485 LC-MS/MS.

486

487 **Figure 3: ABPP-HT reveals cell type-specific DUB profiles.** DUB intensities as determined by HA-Ub-PA activity-  
488 based probe profiling (ABPP) and identified from different cell types and tissue quantified by mass  
489 spectrometry using either a QE orbitrap (OT) or timsTOF (TT), normalised within each dataset.

490

491 **Figure 4. ABPP-HT allows fast generation of DUB inhibitor selectivity profiles in a cellular context.** **A-D.** USP7,  
492 HA, and GAPDH (loading control) immunoblots of a concentration dependence of FT671 USP7 specific inhibitor  
493 and NEM (a general cysteine modifier) in mouse brain tissue and MCF-7 cell lysates. **E.** The densitometric  
494 quantification (WB) of three independent experiments as in Figure 4A from the intensity of the HA-Ub-PA USP7  
495 MCF-7 labelled band (SEM, n=3), normalised to the intensity of both USP7 bands together, compared to the



496 MCF-7 timsTOF LFQ normalised intensity (TT) of immunoprecipitated USP7 (MS data SEM n=3 (for 0.2  $\mu$ M,  
497 n=2)). **F.** The activity of a panel of DUBS identified by timsTOF MS from MCF-7 with increasing concentration  
498 of FT671 (SEM n=3 (for 0.2  $\mu$ M, n=2)). **G.** The densitometric quantification of Figure 4B from the intensity of  
499 the HA-Ub-PA USP7 mouse brain labelled band, normalised to the intensity of both USP7 bands together (WB),  
500 compared to the mouse brain timsTOF LFQ normalised intensity (TT) of immunoprecipitated USP7. **H.** The  
501 activity of a panel of DUBS identified by timsTOF MS from mouse brain with increasing concentration of FT671.  
502 **I-J.** The activity of a panel of DUBS identified by timsTOF MS from mouse brain and MCF-7 lysates respectively,  
503 treated with either 1 mM or 10 mM of NEM.

504

505 **Figure 5. ABPP-HT reveals DUB inhibitor selectivity and specificity compatible with higher throughput.** **A.** The  
506 activity of a panel of DUBs from MCF-7 identified from timsTOF MS, in response to USP7 specific inhibitors  
507 FT671 (n=3 (for 0.2  $\mu$ M n=2)), FT827, HBX108 and P22077. **B.** The activity of a panel of DUBs from mouse brain  
508 lysate identified from timsTOF MS, in response to USP30 specific inhibitors 3-b and 39. **C.** The activity of a panel  
509 of DUBs in MCF-7 lysates identified by timsTOF LC-MS/MS, in response to the cysteine modifier NEM, and  
510 broad spectrum DUB inhibitor PR619 (PR619 n=2). **D-I.** From left to right concentration dependences of USP7  
511 from inhibitors FT671, FT827, HBX41108, and P22077 in MCF-7 lysates, and USP30 inhibitors for 3-b and 39 in  
512 mouse brain. **K.** IC50 values extracted from D-I, fit to equation:  $Y=100/(1+X/IC50)$ . \* = normalised raw  
513 intensities, not LFQ intensities.

514

515 **Figure 6. ABPP workflows optimised for DUBome depth and throughput.** Comparison of cost and time  
516 between ABPP assays optimised for maximal coverage of cellular DUBs (DUBome depth – Y-axis) and higher-  
517 throughput approaches including traditional ABPP, immunoblot based ABPP and accelerated throughput ABPP  
518 (ABPP- HT) (Throughput – X-axis). Size of the circles are plotted represent relative cost per inhibitor compound  
519 tested.

520

521 **Figure S1. Optimizing DUB target engagement in the ABPP-HT workflow** **A.** HA immunoblot of probe to lysate  
522 ratio optimisation, with 50  $\mu$ g of either SHSY5Y lysate or MCF-7 lysate incubated with increasing amounts of  
523 HA-Ub-PA at 37 °C for 45 minutes. **B.** Concentration dependence of unbound antibody detected with antibody  
524 loading onto protein A columns. **C.** Concentration dependence of unbound HA-Ub-PA probe detected with HA-  
525 Ub-PA loading onto protein G column with 80  $\mu$ g of antibody loaded. **D.** USP7 detected in IP flow-through  
526 where 100  $\mu$ g of HA antibody has been loaded. Values in red were used for quantitation in figure 2B. <sup>a</sup> protein  
527 A column, <sup>b</sup> protein G column, \*material was concentrated before loading to try to minimize loading time, the  
528 reduction in material is attributable to protein lost during the concentration step, not to increased HA-Ub-PA  
529 anti-HA binding. In each lane 5  $\mu$ g of protein was loaded except in the case of 10  $\mu$ g and 50  $\mu$ g where samples  
530 were too dilute to load 5  $\mu$ g.

531

532 **Figure S2. Efficient immunoprecipitation of USP7 with ABPP-HT** USP7 immunoblot of FT671 concentration  
533 dependence. Before immunoprecipitation demonstrates probe labelling and inhibition, the supernatant and  
534 eluant bands show unlabelled and labelled bands respectively.

535

536 **Figure S3. DUB inhibitors used in this study.** USP7 inhibitors FT671 FT827, P22077, HBX 41108, USP30 inhibitor  
537 39, USP30 inhibitor 3-b, and broad-spectrum cysteine modifiers NEM and PR619.

538

539 **Figure S4. Inhibitor cellular target engagement assessed by ABPP.** **A.** USP30 immunoblot of specific USP30  
540 inhibitors 3-b and 39, and broad DUB inhibitor NEM in mouse brain lysates. **B.** USP7 and anti-HA immunoblot

541 of specific USP7 inhibitors FT829, HBX108 and P22077. **C.** USP7 and anti-HA immunoblot of specific USP7  
542 inhibitor FT671. **D.** Anti-HA immunoblot with broad-spectrum DUB inhibitor PR619. **E-H.** ABPP inhibition profile  
543 of a panel of DUBs by FT827, HBX41108, P22077, and PR609 (one experiment, except for PR609: SEM; n=2).

# Figure 1

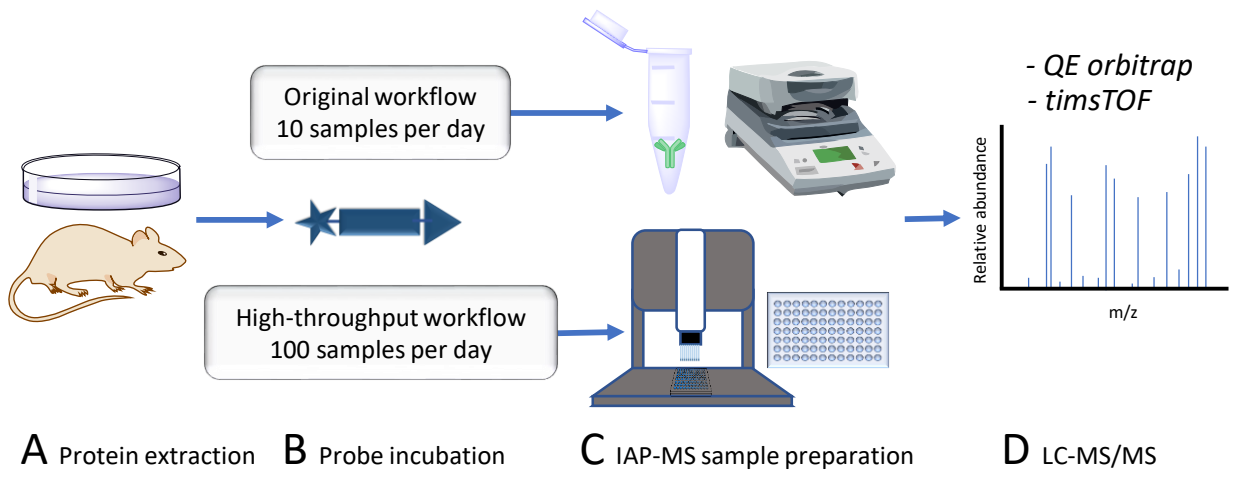

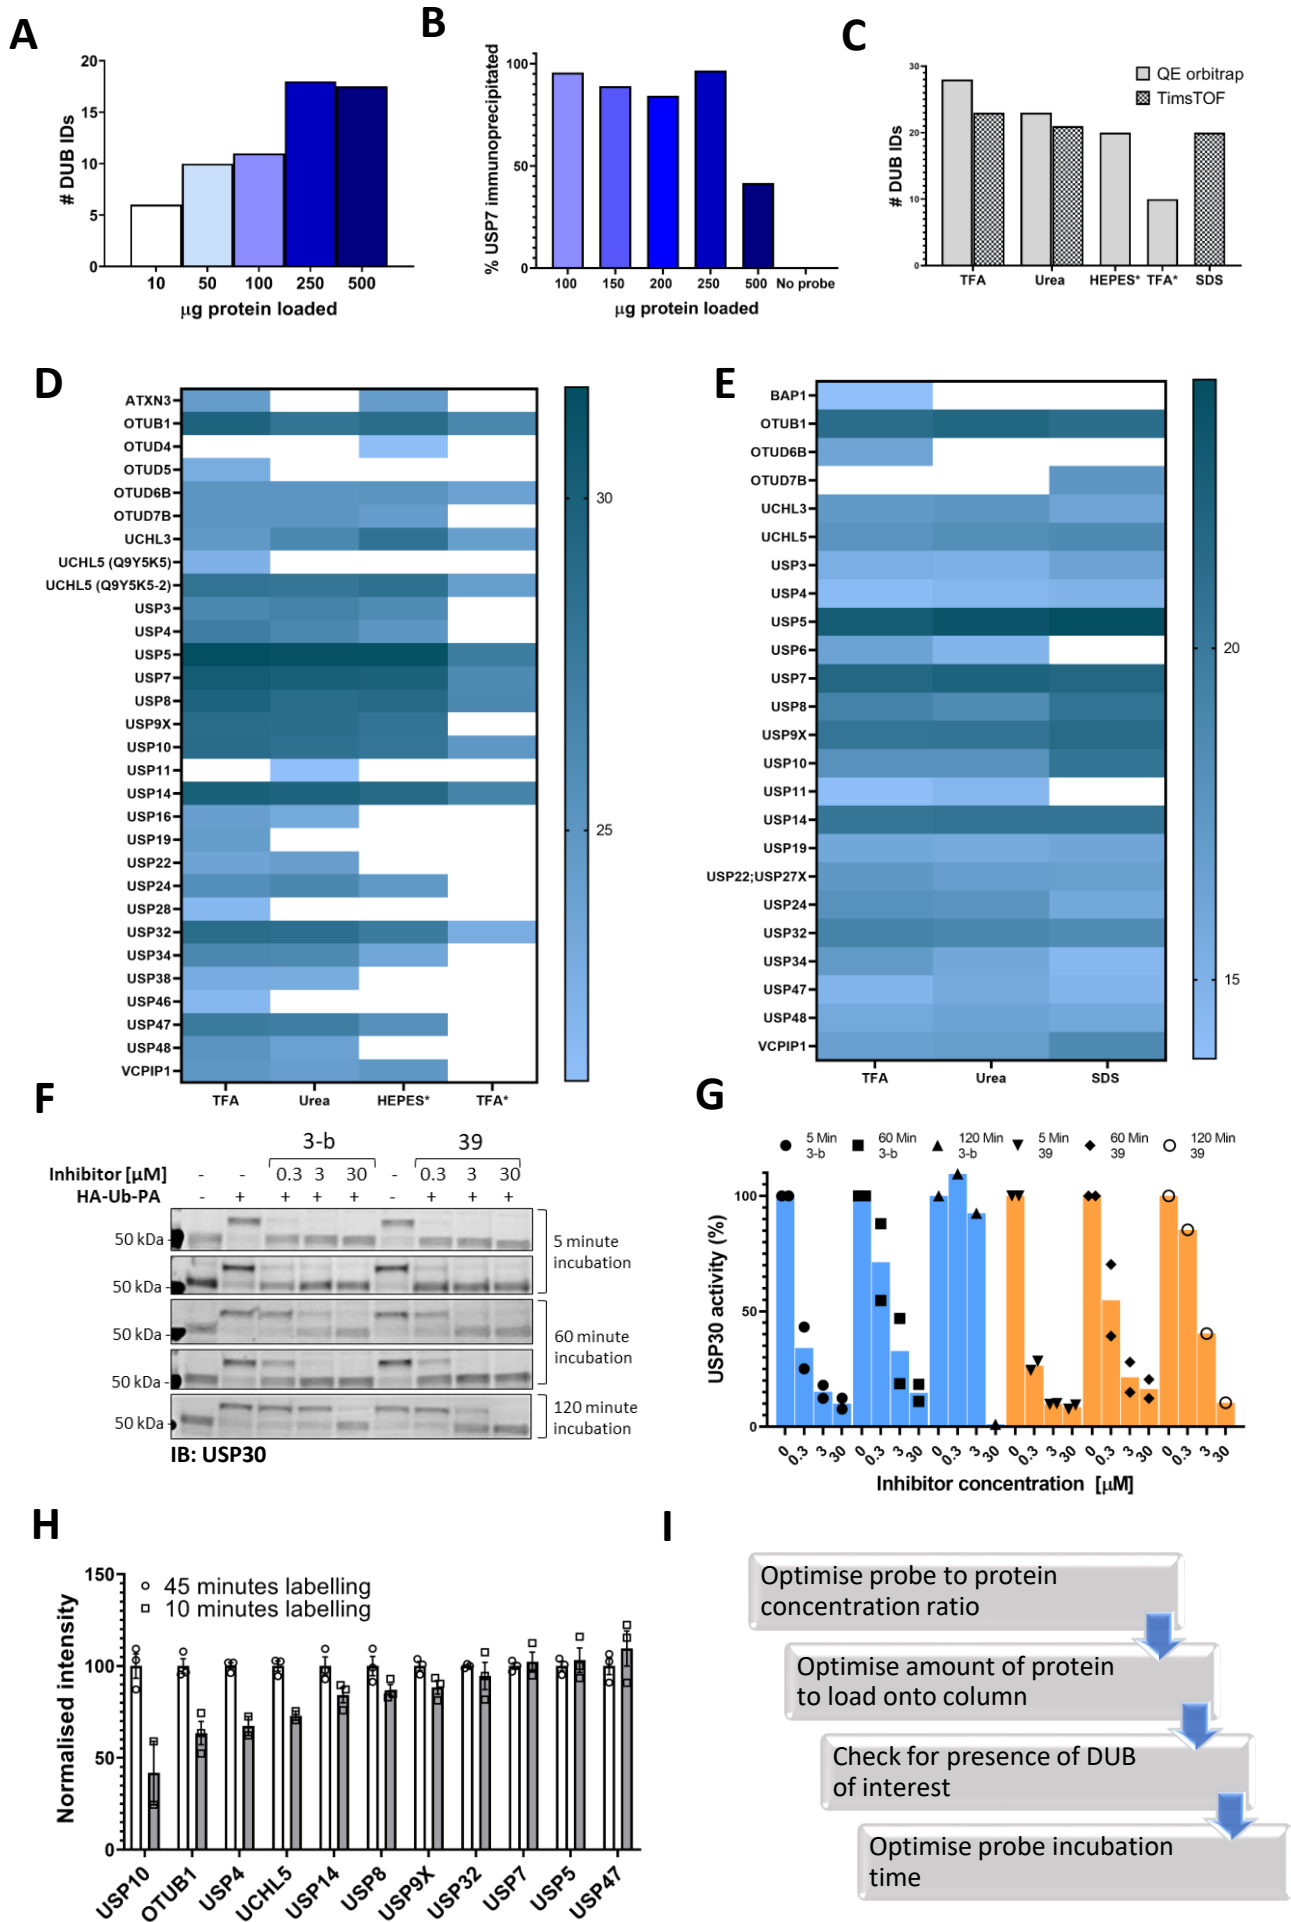

# Figure 3

(which was not certified by peer review) is the author/funder, who has granted bioRxiv a license to display the preprint in perpetuity. It is made available under aCC-BY-NC-ND 4.0 International license.

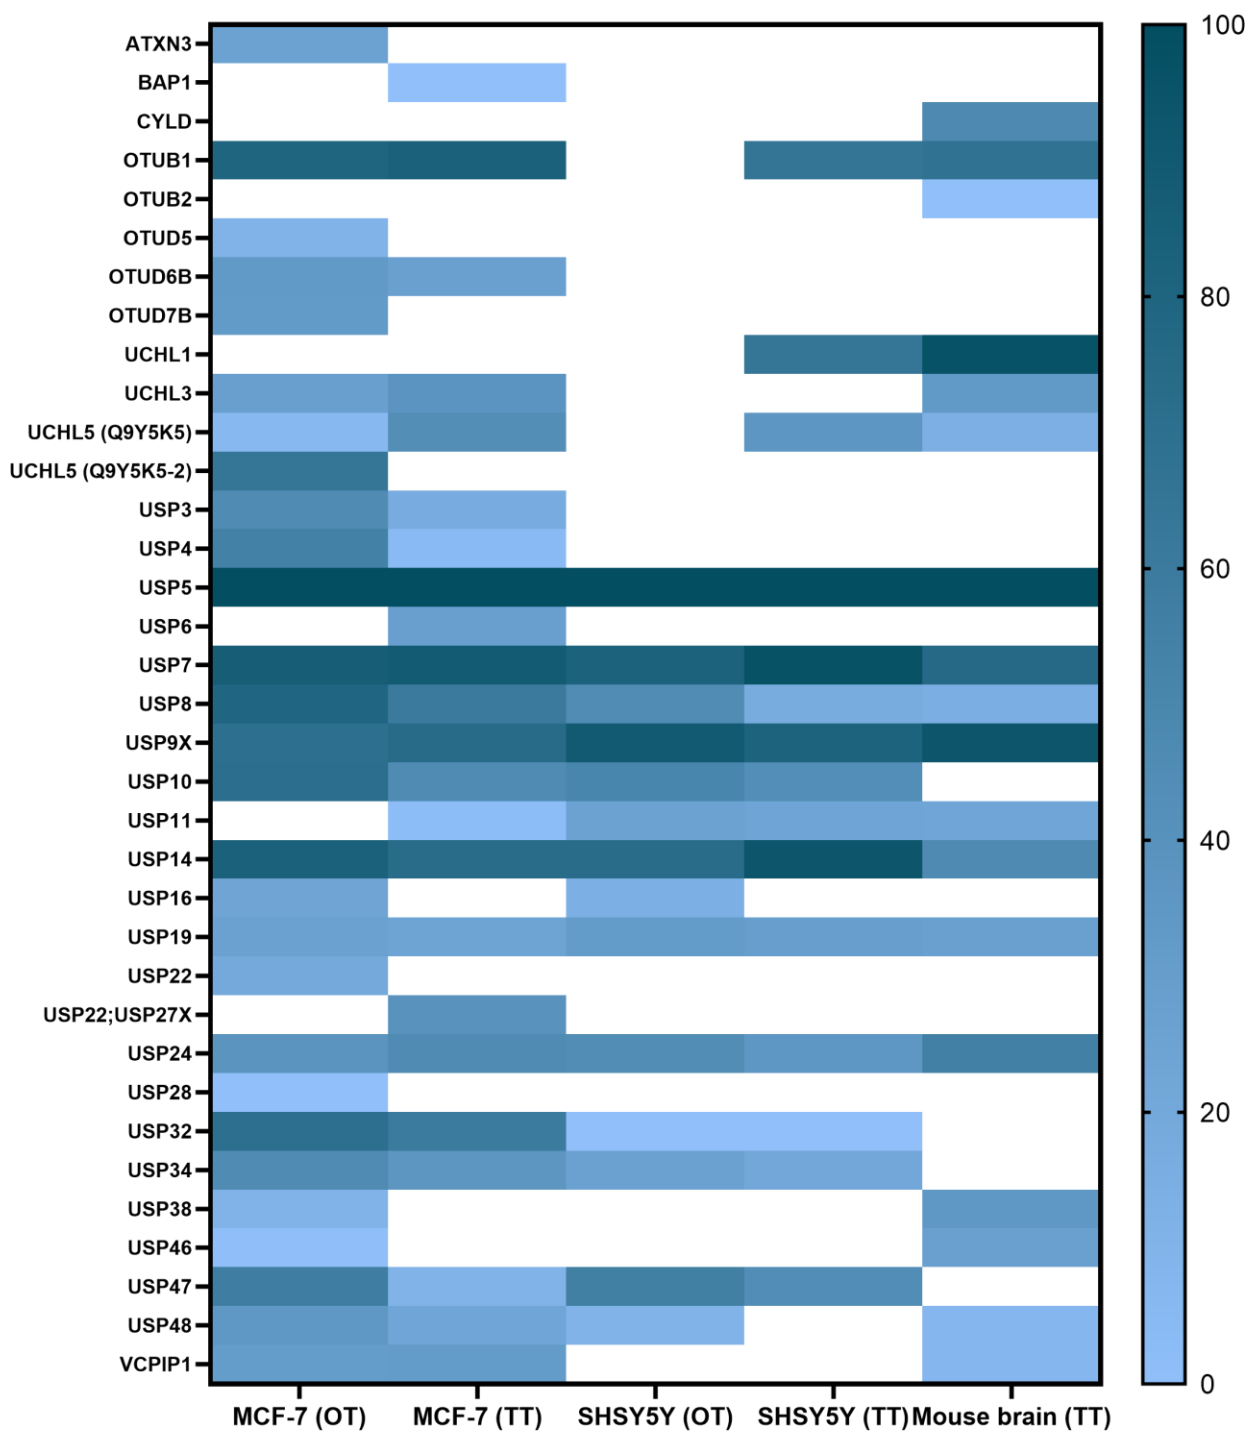

# Figure 4

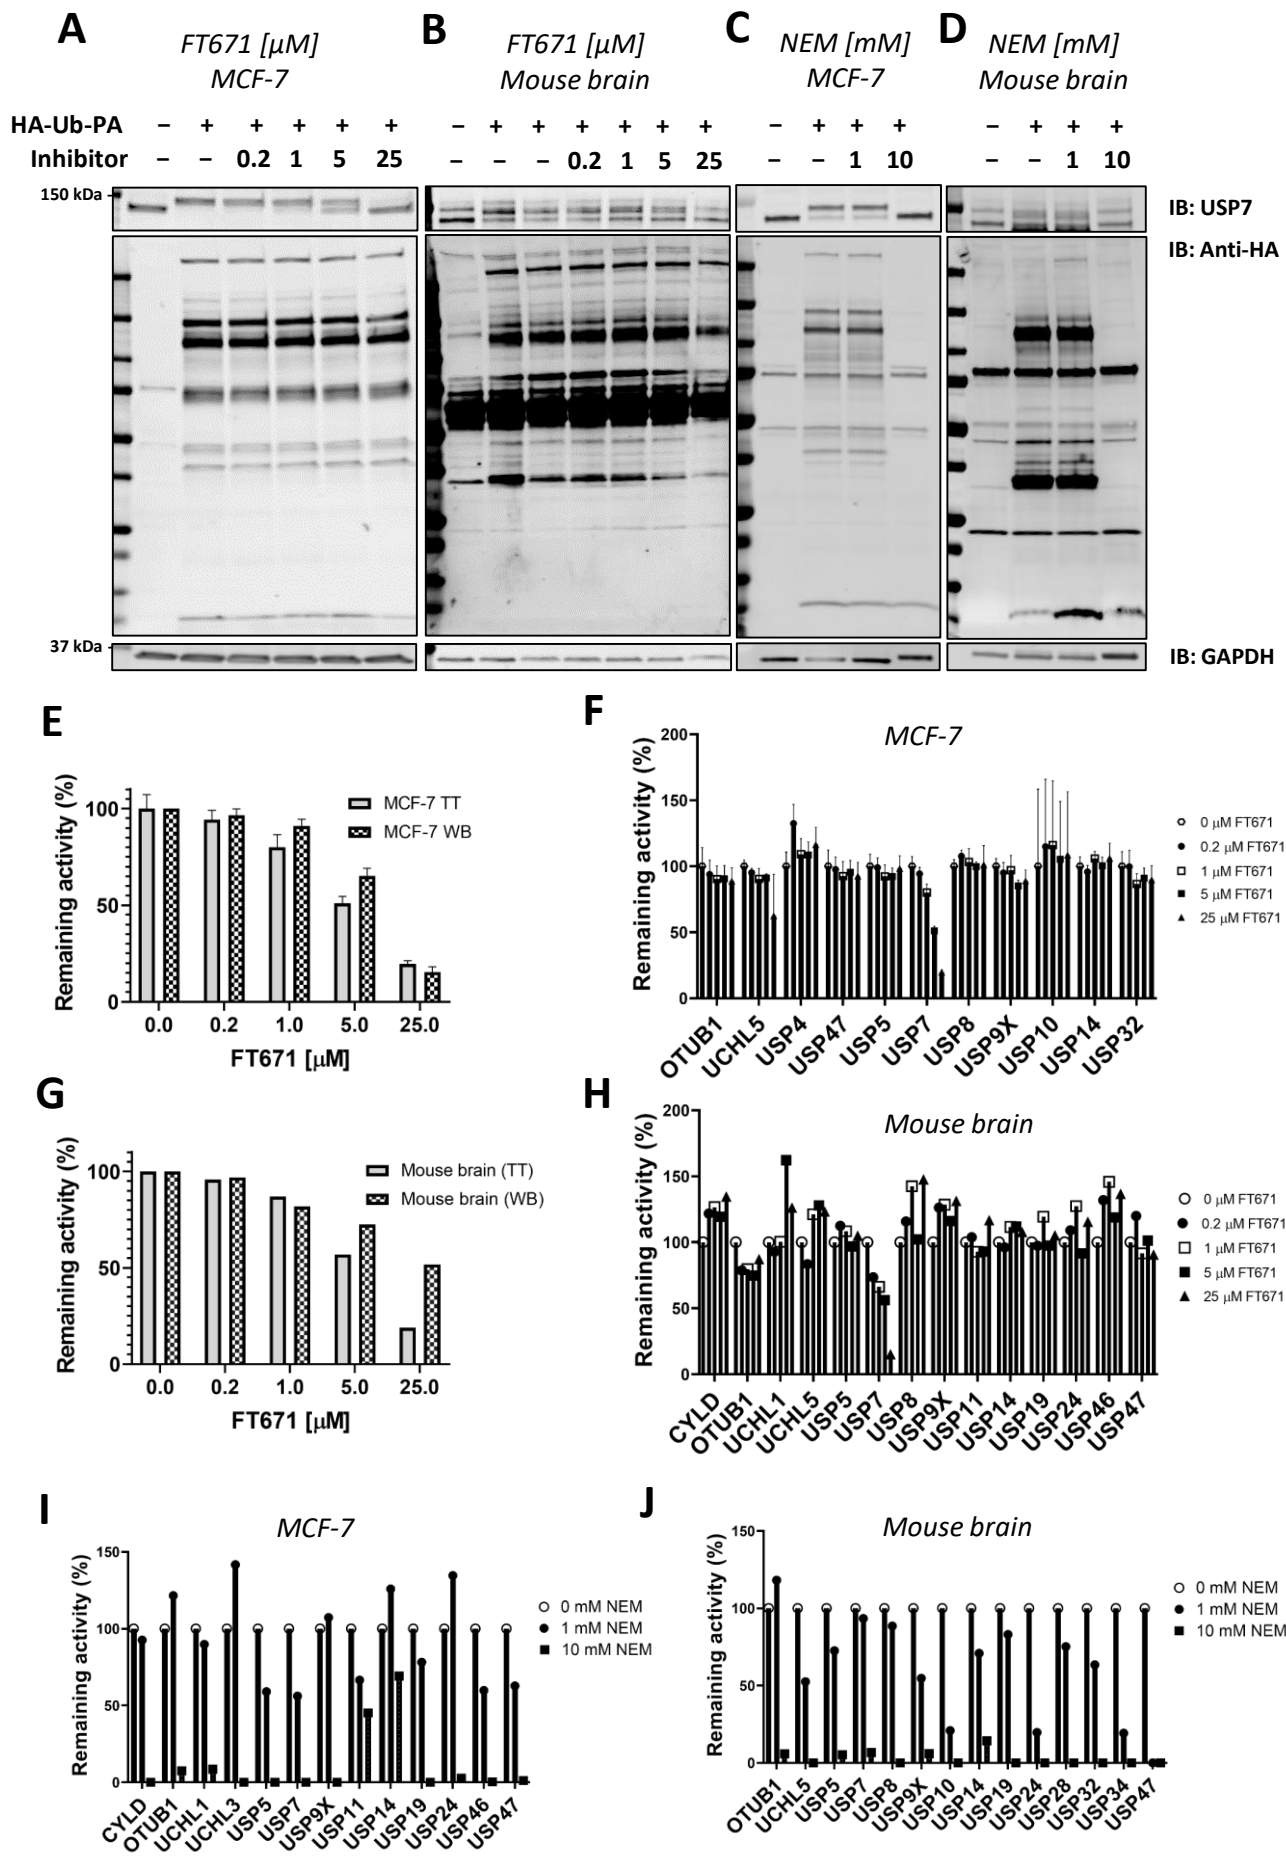



# Figure 5

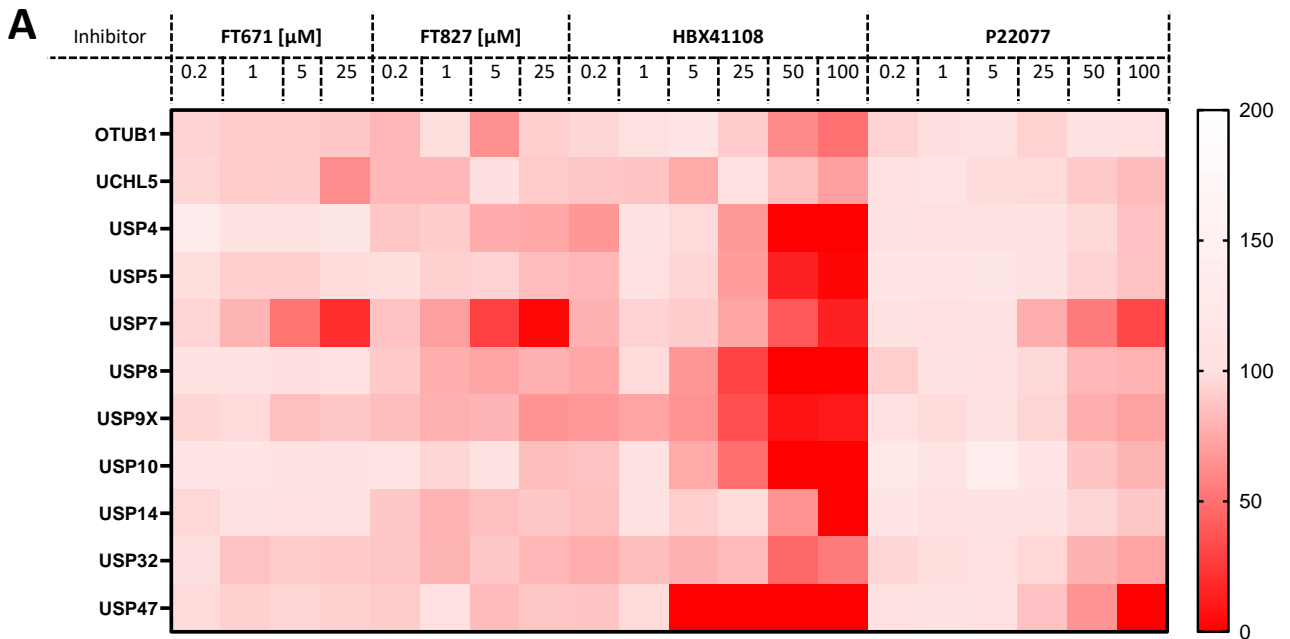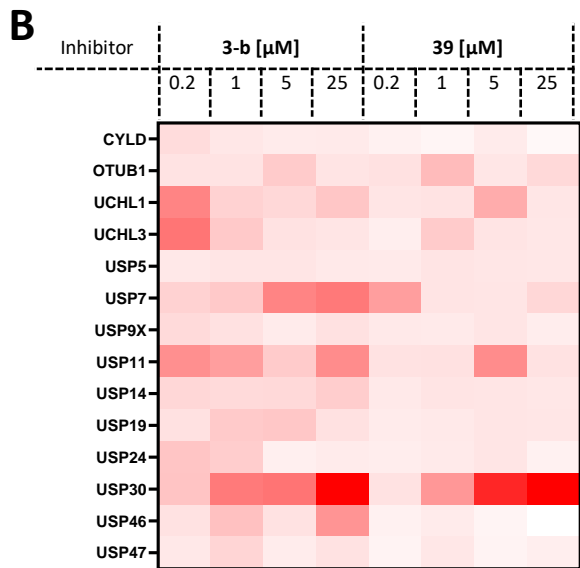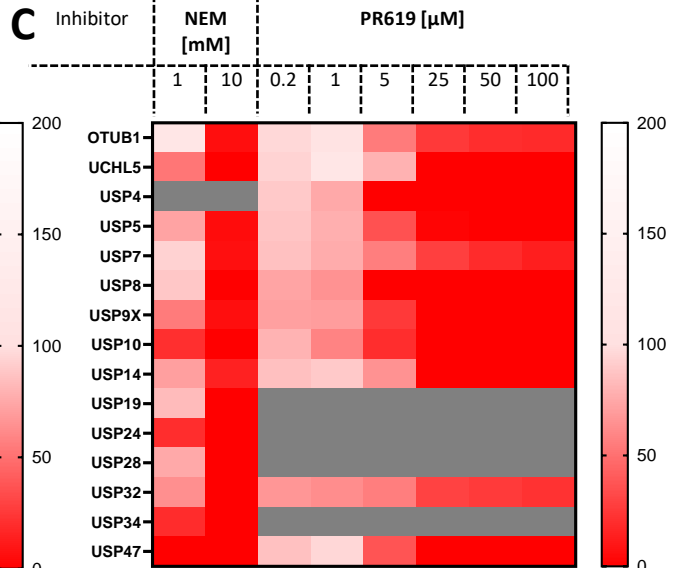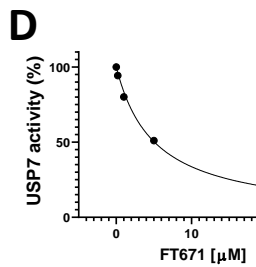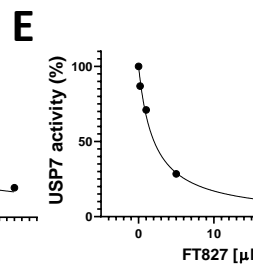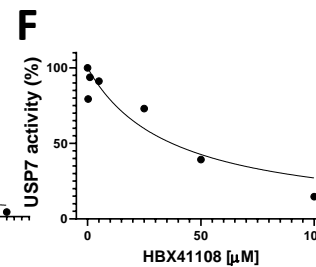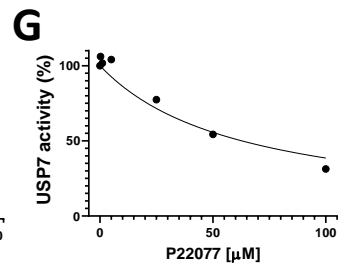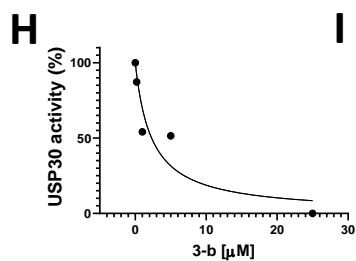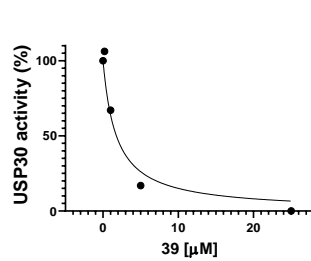

**J**

| Inhibitor | DUB   | IC50 [ $\mu\text{M}$ ]   |
|-----------|-------|--------------------------|
| FT827     | USP7  | 2.1 (95 % CI 1.5-2.8)    |
| FT671     | USP7  | 5.1 (95 % CI 4.1-6.3)    |
| P22077    | USP7  | 62.8 (95 % CI 42.8-93.9) |
| HBX41108  | USP7  | 37.2 (95 % CI 19.2-70.7) |
| 3-b       | USP30 | 2.3 (95 % CI 0.68-8.58)  |
| 39        | USP30 | 1.77 (95 % CI 0.81-3.9)  |
| PR619     | USP7  | 7 (95 % CI 3.6 to 13.2)  |

# Figure 6

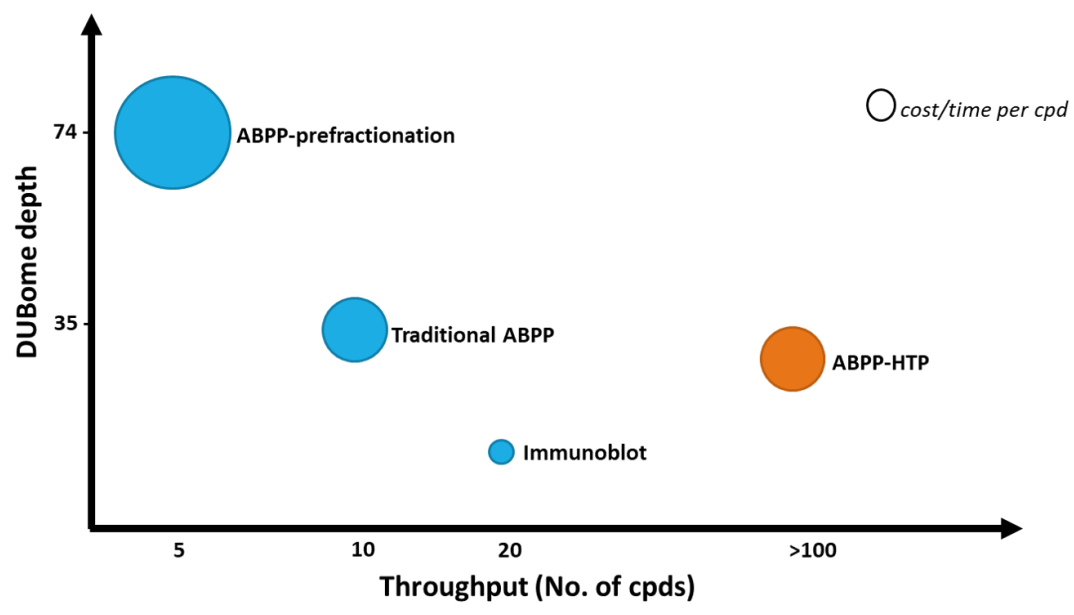

# Figure S1

(which was not certified by peer review) is the author/funder, who has granted bioRxiv a license to display the preprint in perpetuity. It is made available under aCC-BY-NC-ND 4.0 International license.

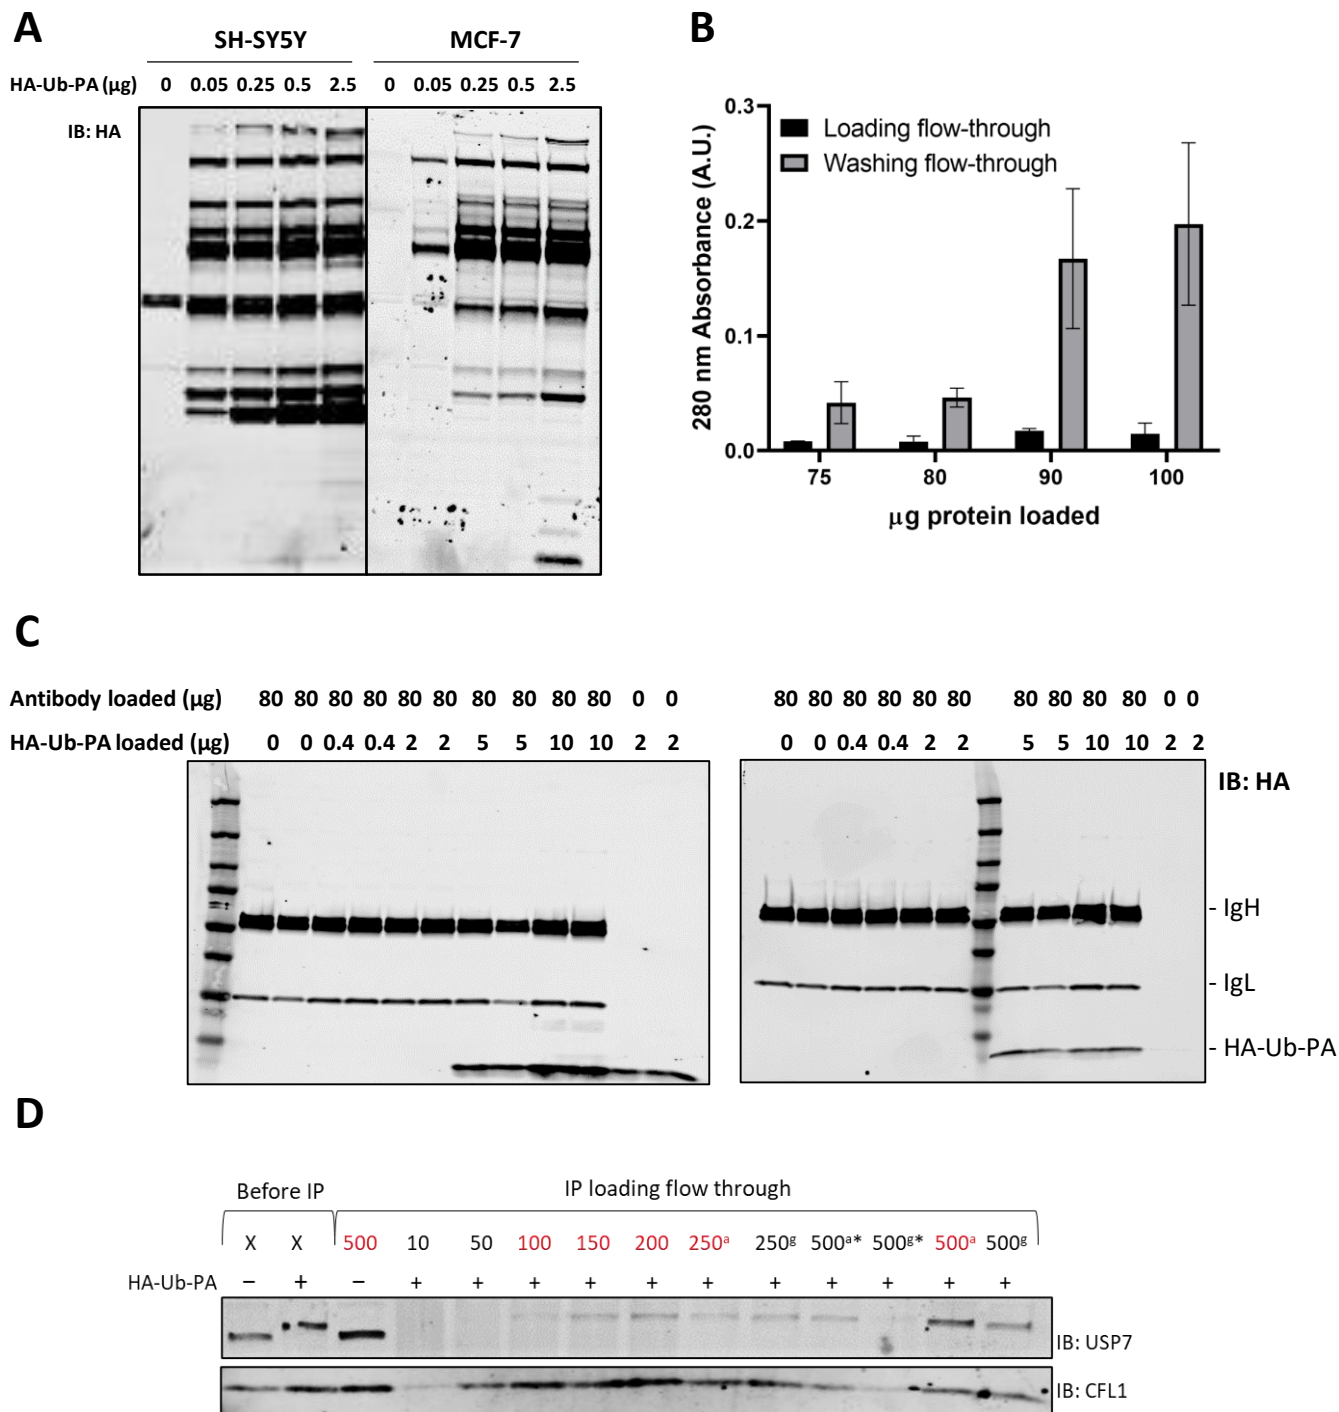

# Figure S2

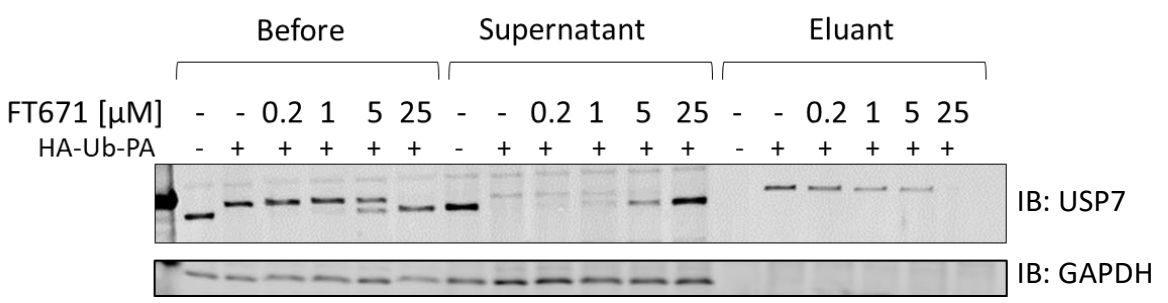

# Figure S3

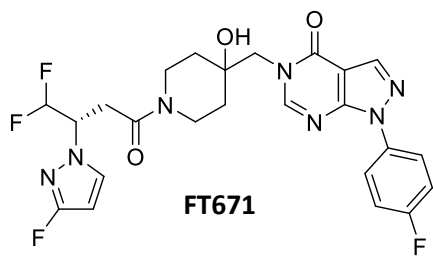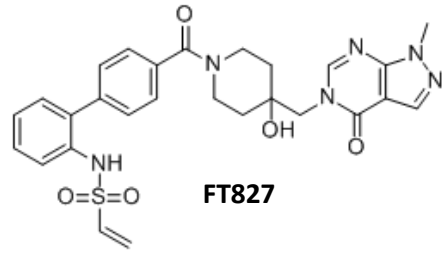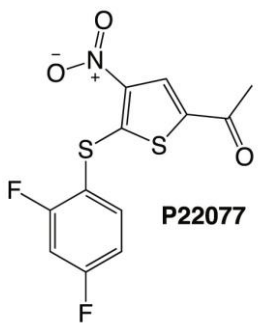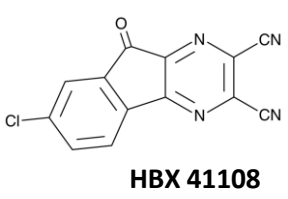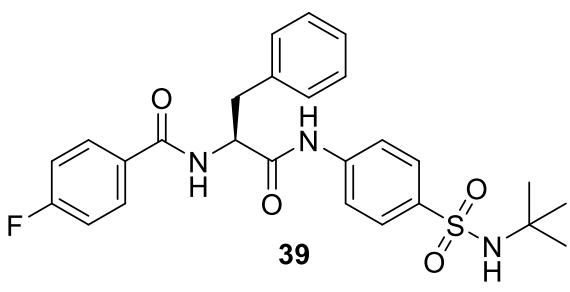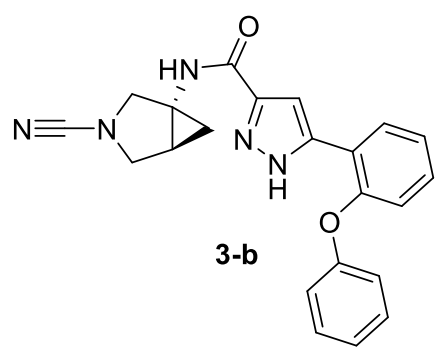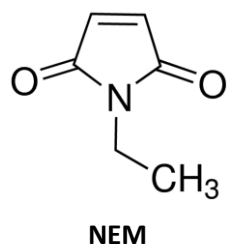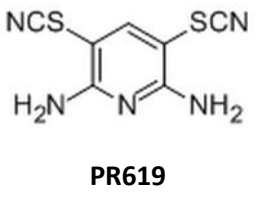

Source: https://biorxiv.org/content/10.1101/2020.12.10.419499v1.full.pdf
